# Supplementary material
Source: PubMed Central journal article supplement (PMC8221706)
Supplement: sj-pdf-1-jdr-10.1177_0022034521990652.pdf [file sj-pdf-1-jdr-10.1177_0022034521990652.pdf]

**Appendix Table 1:** Summary of T-helper Subsets Related to Apical Periodontitis and Periodontitis

| T-helper Subsets*  | General Characteristics and Functions                                                                                                                                                                               | Molecular Features                                                                                                                                                                                                    | Role in Chronic Oral Inflammation**                                                                                                                                                                                                                                                                                                                                                                                                 | References***                                                                                                             |
|--------------------|---------------------------------------------------------------------------------------------------------------------------------------------------------------------------------------------------------------------|-----------------------------------------------------------------------------------------------------------------------------------------------------------------------------------------------------------------------|-------------------------------------------------------------------------------------------------------------------------------------------------------------------------------------------------------------------------------------------------------------------------------------------------------------------------------------------------------------------------------------------------------------------------------------|---------------------------------------------------------------------------------------------------------------------------|
| Th1                | <ul style="list-style-type: none"> <li>Cell mediated inflammation</li> <li>Intracellular pathogen defense</li> <li>Delayed-type hypersensitivity reactions</li> </ul>                                               | <ul style="list-style-type: none"> <li><b>Major Associated Cytokines:</b> IFN-<math>\gamma</math>, IL-2, IL-12 and TNF-<math>\alpha</math></li> <li><b>Signature Transcription Factor(s):</b> T-bet, STAT4</li> </ul> | <p><b>Apical Periodontitis:</b></p> <ul style="list-style-type: none"> <li>Disease progression and severity</li> <li>Associated marker (IFN-<math>\gamma</math>) observed in radicular cysts</li> </ul> <p><b>Periodontitis:</b></p> <ul style="list-style-type: none"> <li>Disease progression and severity</li> <li>Elevated expression of IFN-<math>\gamma</math> and T-bet observed in human disease progression</li> </ul>     | (de Carvalho Fraga et al. 2013; de Vries et al. 2017; Dutzan et al. 2009; Fukada et al. 2009; Teixeira-Salum et al. 2010) |
| Th2                | <ul style="list-style-type: none"> <li>Multicellular parasite defense</li> <li>Allergic reactions (IgE-mediated hypersensitivity)</li> <li>Suppression of pro-inflammatory T cells (e.g. Th1, Th17)</li> </ul>      | <ul style="list-style-type: none"> <li><b>Major Associated Cytokines:</b> IL-4, IL-5, IL-13, IL-9, IL-10.</li> <li><b>Signature Transcription Factor(s):</b> GATA3, STAT6</li> </ul>                                  | <p><b>Apical Periodontitis:</b></p> <ul style="list-style-type: none"> <li>Associated cytokines observed in periapical granulomas</li> </ul> <p><b>Periodontitis:</b></p> <ul style="list-style-type: none"> <li>Imbalance of Th1/Th2 associated with disease progression, autoreactive B cell development and osteoclast activity in chronic lesions</li> <li>Th2 infiltration negatively correlated to RANKL/OPG ratio</li> </ul> | (Berglundh and Donati 2005; de Vries et al. 2017; Fukada et al. 2009)                                                     |
| Th17 (Homeostatic) | <ul style="list-style-type: none"> <li>Pathogen defense</li> <li>Mucosal barrier homeostasis and defense</li> <li>Cell mediated inflammation and autoimmune disease</li> <li>Phenotype Plasticity: (e.g.</li> </ul> | <ul style="list-style-type: none"> <li><b>Major Associated Cytokines:</b> IL-17A, IL-17F, IL-21, IL-22</li> <li><b>Signature Transcription Factor(s):</b> ROR<math>\gamma</math>t, STAT3</li> </ul>                   | <p><b>Apical Periodontitis:</b></p> <ul style="list-style-type: none"> <li>Disease progression and severity</li> <li>IL-17 expression associated with “active” lesions</li> <li>ROR<math>\gamma</math>t expression observed in periapical lesions</li> </ul> <p><b>Periodontitis:</b></p>                                                                                                                                           | (Araujo-Pires et al. 2014; de Vries et al. 2017; Dutzan et al. 2018; Moutsopoulos et al. 2012; Tsukasaki et al. 2018)     |

|                         |                                                                                                                                                                                                                     |                                                                                                                                                                                                                 |                                                                                                                                                                                                                                                                                                                                                                                                                                                                                                                                |                                                                                                                                                                        |
|-------------------------|---------------------------------------------------------------------------------------------------------------------------------------------------------------------------------------------------------------------|-----------------------------------------------------------------------------------------------------------------------------------------------------------------------------------------------------------------|--------------------------------------------------------------------------------------------------------------------------------------------------------------------------------------------------------------------------------------------------------------------------------------------------------------------------------------------------------------------------------------------------------------------------------------------------------------------------------------------------------------------------------|------------------------------------------------------------------------------------------------------------------------------------------------------------------------|
|                         | <i>Th1, Treg, or Tfh-like conversion )</i>                                                                                                                                                                          |                                                                                                                                                                                                                 | <ul style="list-style-type: none"> <li>• Disease progression, severity and loss of immune tolerance</li> <li>• Neutrophil recruitment and osteoclastogenesis</li> <li>• Upregulation of IL-17 and ROR<math>\gamma</math>t observed in chronic lesions</li> </ul>                                                                                                                                                                                                                                                               |                                                                                                                                                                        |
| Th17 (Pathogenic)       | <ul style="list-style-type: none"> <li>• Pro-inflammatory (Th1-like) responses</li> <li>• Association with autoimmune and chronic inflammatory disease</li> </ul>                                                   | <ul style="list-style-type: none"> <li>• <b>Major Associated Cytokines:</b> IL-17A, IL-17F, IL-21, IL-22, IFN-<math>\gamma</math>, GM-CSF</li> <li>• <b>Signature Transcription Factor(s):</b> T-bet</li> </ul> | <b>Apical Periodontitis:</b> <ul style="list-style-type: none"> <li>• <i>Not yet characterized</i></li> </ul> <b>Periodontitis:</b> <ul style="list-style-type: none"> <li>• Disease progression and severity (<i>suggested</i>)</li> <li>• Population expansion in disease progression reported</li> </ul>                                                                                                                                                                                                                    | (Bunte and Beikler 2019; Dutzan and Abusleme 2019; Dutzan et al. 2018; Tsukasaki et al. 2018)                                                                          |
| Treg                    | <ul style="list-style-type: none"> <li>• Immune tolerance and homeostasis</li> <li>• Regulate differentiation and activation of pro-inflammatory T cells (e.g Th1, Th17)</li> <li>• Phenotype Plasticity</li> </ul> | <ul style="list-style-type: none"> <li>• <b>Major Associated Cytokines:</b> IL-10, TGF-<math>\beta</math></li> <li>• <b>Signature Transcription Factor(s):</b> Foxp3, STAT5</li> </ul>                          | <b>Apical Periodontitis:</b> <ul style="list-style-type: none"> <li>• Stabilization of lesion expansion (<i>suggested</i>)</li> <li>• Treg associated cytokines (IL-10, TGF-<math>\beta</math>, CCL4) observed concomitant with proinflammatory cytokines in periapical lesions</li> </ul> <b>Periodontitis:</b> <ul style="list-style-type: none"> <li>• Protective role (<i>suggested, controversial</i>)</li> <li>• Enrichment of Tregs observed in disease progression</li> <li>• Subset heterogeneity reported</li> </ul> | (Alvarez et al. 2018; Cafferata et al. 2020; da Motta et al. 2020; Naufel et al. 2017; Rajendran et al. 2019; Samuel et al. 2019; Toledo et al. 2019; Wei et al. 2020) |
| Tfh (Follicular helper) | <ul style="list-style-type: none"> <li>• T-cell dependent humoral immune</li> </ul>                                                                                                                                 | <ul style="list-style-type: none"> <li>• <b>Major Associated Cytokines:</b> IL-21, IL-4, CXCL13</li> </ul>                                                                                                      | <b>Apical Periodontitis:</b> <ul style="list-style-type: none"> <li>• <i>Not well characterized</i></li> <li>• Tfh associated cytokines/marker</li> </ul>                                                                                                                                                                                                                                                                                                                                                                      | (Araujo-Pires et al. 2014)                                                                                                                                             |

|      |                                                                                                                                                                                                                                                                                                       |                                                                                                                                                                         |                                                                                                                                                                                                                                                                                                                                                        |                                                                                                 |
|------|-------------------------------------------------------------------------------------------------------------------------------------------------------------------------------------------------------------------------------------------------------------------------------------------------------|-------------------------------------------------------------------------------------------------------------------------------------------------------------------------|--------------------------------------------------------------------------------------------------------------------------------------------------------------------------------------------------------------------------------------------------------------------------------------------------------------------------------------------------------|-------------------------------------------------------------------------------------------------|
|      | <ul style="list-style-type: none"> <li>responses (assist B cells)</li> <li>Isolated to secondary lymphoid organs</li> <li>Association with broad range of diseases; protective <u>or</u> pathogenic roles</li> </ul>                                                                                  | <ul style="list-style-type: none"> <li><b>Signature Transcription Factor(s):</b><br/>Bcl-6</li> </ul>                                                                   | <p>expression reported in “active” apical granulomas</p> <p><b>Periodontitis:</b></p> <ul style="list-style-type: none"> <li><i>Not well characterized</i></li> <li>Expansion of splenic Tfh populations associated with positive response to novel periodontitis vaccines in mice</li> </ul>                                                          |                                                                                                 |
| Th9  | <ul style="list-style-type: none"> <li>Pro-inflammatory responses (via IL-9)</li> <li><i>Possible regulatory function (via IL-10)</i></li> <li>Association with certain autoimmune and inflammatory diseases (e.g. asthma, SLE, IBD)</li> </ul>                                                       | <ul style="list-style-type: none"> <li><b>Major Associated Cytokines:</b><br/>IL-9, IL-10</li> <li><b>Signature Transcription Factor(s):</b><br/>PU.1, IRF4</li> </ul>  | <p><b>Apical Periodontitis:</b></p> <ul style="list-style-type: none"> <li>Stabilization of lesion activity (<i>suggested</i>)</li> </ul> <p><b>Periodontitis:</b></p> <ul style="list-style-type: none"> <li><i>Not yet characterized</i></li> </ul>                                                                                                  | (Aranha et al. 2013)                                                                            |
| Th22 | <ul style="list-style-type: none"> <li>Immune tolerance and protection</li> <li>Stimulation of non-immune cells (e.g. osteoclasts, fibroblasts)</li> <li>Association with autoimmune disease (e.g. RA, SLE, MS, psoriasis); <i>Role and mechanism in pathogenesis not fully elucidated</i></li> </ul> | <ul style="list-style-type: none"> <li><b>Major Associated Cytokines:</b><br/>IL-22, IL-26, IL-33</li> <li><b>Signature Transcription Factor(s):</b><br/>AhR</li> </ul> | <p><b>Apical Periodontitis:</b></p> <ul style="list-style-type: none"> <li>Stabilization of lesion activity (<i>suggested</i>)</li> </ul> <p><b>Periodontitis:</b></p> <ul style="list-style-type: none"> <li>Disease severity and osteoclast activity</li> <li>Increased IL-22 and AhR expression correlated to clinical attachment levels</li> </ul> | (Aranha et al. 2013; Araujo-Pires et al. 2014; Diaz-Zuniga et al. 2017; Monasterio et al. 2019) |

AhR - Aryl hydrocarbon receptor; Bcl-6 - B-cell lymphoma 6 protein; IRF4 - Interferon regulatory factor 4; RORyt - Retinoic acid-orphan receptor;

T-bet - T box expressed in T cell; Summary of General characteristics and functions adapted from Raphael et al. (2015) and Crotty (2019)

*\*List does not fully represent all current known subsets*

*\*\*Mechanistic role of the various T-helper subsets is not fully understood in both periodontitis and apical periodontitis*

*\*\*\*Selected references relevant to oral chronic inflammatory diseases*

## REFERENCES

- Alvarez C, Rojas C, Rojas L, Cafferata EA, Monasterio G, Vernal R. 2018. Regulatory t lymphocytes in periodontitis: A translational view. *Mediators Inflamm.* 2018:7806912.
- Aranha AM, Repeke CE, Garlet TP, Vieira AE, Campanelli AP, Trombone AP, Letra A, Silva RM, Garlet GP. 2013. Evidence supporting a protective role for th9 and th22 cytokines in human and experimental periapical lesions. *J Endod.* 39(1):83-87.
- Araujo-Pires AC, Francisconi CF, Bigueti CC, Cavalla F, Aranha AM, Letra A, Trombone AP, Favari M, Silva RM, Garlet GP. 2014. Simultaneous analysis of t helper subsets (th1, th2, th9, th17, th22, tfh, tr1 and tregs) markers expression in periapical lesions reveals multiple cytokine clusters accountable for lesions activity and inactivity status. *J Appl Oral Sci.* 22(4):336-346.
- Berglundh T, Donati M. 2005. Aspects of adaptive host response in periodontitis. *J Clin Periodontol.* 32 Suppl 6:87-107.
- Bunte K, Beikler T. 2019. Th17 cells and the il-23/il-17 axis in the pathogenesis of periodontitis and immune-mediated inflammatory diseases. *Int J Mol Sci.* 20(14).
- Cafferata EA, Terraza-Aguirre C, Barrera R, Faundez N, Gonzalez N, Rojas C, Melgar-Rodriguez S, Hernandez M, Carvajal P, Cortez C et al. 2020. Interleukin-35 inhibits alveolar bone resorption by modulating the th17/treg imbalance during periodontitis. *J Clin Periodontol.* 47(6):676-688.
- da Motta RJG, Almeida LY, Villafuerte KRV, Ribeiro-Silva A, Leon JE, Tirapelli C. 2020. Foxp3+ and cd25+ cells are reduced in patients with stage iv, grade c periodontitis: A comparative clinical study. *J Periodontal Res.* 55(3):374-380.
- de Carvalho Fraga CA, Alves LR, de Sousa AA, de Jesus SF, Vilela DN, Pereira CS, Batista Domingos PL, Viana AG, Jham BC, Batista de Paula AM et al. 2013. Th1 and th2-like protein balance in human inflammatory radicular cysts and periapical granulomas. *J Endod.* 39(4):453-455.
- de Vries TJ, Andreotta S, Loos BG, Nicu EA. 2017. Genes critical for developing periodontitis: Lessons from mouse models. *Front Immunol.* 8:1395.
- Diaz-Zuniga J, Melgar-Rodriguez S, Rojas L, Alvarez C, Monasterio G, Carvajal P, Vernal R. 2017. Increased levels of the t-helper 22-associated cytokine (interleukin-22) and transcription factor (aryl hydrocarbon receptor) in patients with periodontitis are associated with osteoclast resorptive activity and severity of the disease. *J Periodontal Res.* 52(5):893-902.
- Dutzan N, Abusleme L. 2019. T helper 17 cells as pathogenic drivers of periodontitis. *Adv Exp Med Biol.* 1197:107-117.
- Dutzan N, Gamonal J, Silva A, Sanz M, Vernal R. 2009. Over-expression of forkhead box p3 and its association with receptor activator of nuclear factor-kappa b ligand, interleukin (il) -17, il-10 and transforming growth factor-beta during the progression of chronic periodontitis. *J Clin Periodontol.* 36(5):396-403.
- Dutzan N, Kajikawa T, Abusleme L, Greenwell-Wild T, Zuazo CE, Ikeuchi T, Brenchley L, Abe T, Hurabielle C, Martin D et al. 2018. A dysbiotic microbiome triggers th17 cells to mediate oral mucosal immunopathology in mice and humans. *Sci Transl Med.* 10(463).
- Fukada SY, Silva TA, Garlet GP, Rosa AL, da Silva JS, Cunha FQ. 2009. Factors involved in the t helper type 1 and type 2 cell commitment and osteoclast regulation in inflammatory apical diseases. *Oral Microbiol Immunol.* 24(1):25-31.
- Monasterio G, Budini V, Fernandez B, Castillo F, Rojas C, Alvarez C, Cafferata EA, Vicencio E, Cortes BI, Cortez C et al. 2019. Il-22-expressing cd4(+) ahr(+) t lymphocytes are associated with rankl-mediated alveolar bone resorption during experimental periodontitis. *J Periodontal Res.* 54(5):513-524.
- Moutsopoulos NM, Kling HM, Angelov N, Jin W, Palmer RJ, Nares S, Osorio M, Wahl SM. 2012. *Porphyromonas gingivalis* promotes th17 inducing pathways in chronic periodontitis. *J Autoimmun.* 39(4):294-303.
- Naufel AO, Aguiar MCF, Madeira FM, Abreu LG. 2017. Treg and th17 cells in inflammatory periapical disease: A systematic review. *Braz Oral Res.* 31:e103.

- Rajendran M, Looney S, Singh N, Elashiry M, Meghil MM, El-Awady AR, Tawfik O, Susin C, Arce RM, Cutler CW. 2019. Systemic antibiotic therapy reduces circulating inflammatory dendritic cells and treg-th17 plasticity in periodontitis. *J Immunol.* 202(9):2690-2699.
- Samuel RO, Ervolino E, de Azevedo Queiroz IO, Azuma MM, Ferreira GT, Cintra LTA. 2019. Th1/th2/th17/treg balance in apical periodontitis of normoglycemic and diabetic rats. *J Endod.* 45(8):1009-1015.
- Teixeira-Salum TB, Rodrigues DB, Gervasio AM, Souza CJ, Rodrigues V, Jr., Loyola AM. 2010. Distinct th1, th2 and treg cytokines balance in chronic periapical granulomas and radicular cysts. *J Oral Pathol Med.* 39(3):250-256.
- Toledo AON, Couto AMD, Madeira MFM, Caldeira PC, Queiroz-Junior CM, Aguiar MCF. 2019. Cytokines and chemokines associated with treg/th17 response in chronic inflammatory periapical disease. *Braz Oral Res.* 33:e093.
- Tsukasaki M, Komatsu N, Nagashima K, Nitta T, Pluemsakunthai W, Shukunami C, Iwakura Y, Nakashima T, Okamoto K, Takayanagi H. 2018. Host defense against oral microbiota by bone-damaging t cells. *Nat Commun.* 9(1):701.
- Wei L, Xu M, Xiong H. 2020. An update of knowledge on the regulatory role of treg cells in apical periodontitis. *Oral Dis.*

**Appendix Table 2: Th17 Cells Associated Systemic Autoimmune and Chronic Inflammatory Diseases**

| <b>Immunologic and Chronic Inflammatory Diseases</b>                         | <b>Th17 Significance</b>                                                                                                                                                                                                                                                                                                                                                                                                                                                                                                                                                                                          | <b>Reference</b>                                                                                                                                                                                                                 |
|------------------------------------------------------------------------------|-------------------------------------------------------------------------------------------------------------------------------------------------------------------------------------------------------------------------------------------------------------------------------------------------------------------------------------------------------------------------------------------------------------------------------------------------------------------------------------------------------------------------------------------------------------------------------------------------------------------|----------------------------------------------------------------------------------------------------------------------------------------------------------------------------------------------------------------------------------|
| Multiple Sclerosis (MS) / Experimental Auto-immune encephalomyelitis (EAE) * | <ul style="list-style-type: none"><li>• Overexpression of IL-17A in CNS biopsies of MS patients</li><li>• Significant Th17 cell infiltration in active MS lesions</li><li>• Th17/Treg imbalance associated with MS pathogenesis</li><li>• Murine Models (EAE):<ul style="list-style-type: none"><li>○ Associated with onset and severity of disease</li><li>○ IL-17A auto-vaccine prevents disease</li><li>○ Th17 cells accumulate in diseased CNS tissue</li></ul></li></ul>                                                                                                                                     | (Fletcher et al. 2009; Kebir et al. 2007; Langrish et al. 2005; Li et al. 2017; Lock et al. 2002; Ma et al. 2010; Matuszewicz et al. 1999; Park et al. 2005; Tzartos et al. 2008; Uyttenhove and Van Snick 2006)                 |
| Type I Diabetes (T1D)                                                        | <ul style="list-style-type: none"><li>• Elevated serum IL-17 levels reported in T1D patients</li><li>• Th17 cells associated with progression of T1D</li><li>• IL-17 SNP associated with increased risk for T1D</li><li>• Murine Models:<ul style="list-style-type: none"><li>○ Th17 cells indicated in pancreatic inflammation and correlated with insulinitis (T1D model)</li><li>○ Th17 transfer model of T1D demonstrates onset and rate of disease progression akin to Th1 transfer—transferred Th17 cells transform to pathogenic phenotype (produce IL17 &amp; IFN<math>\gamma</math>)</li></ul></li></ul> | (Abdel-Moneim et al. 2018; Borilova Linhartova et al. 2016; Bradshaw et al. 2009; Espinoza et al. 2011; Kumar and Subramaniyam 2015; Li et al. 2014; Martin-Orozco et al. 2009; Reinert-Hartwall et al. 2015; Roohi et al. 2014) |
| Type II Diabetes (T2D)                                                       | <ul style="list-style-type: none"><li>• Increased IL-17 levels reported in serum of recently diagnosed T2D patients and correlated to TNF-alpha expression</li><li>• IL-17 implicated in induction mechanisms of insulin resistance and beta-cell apoptosis</li><li>• Murine Models:<ul style="list-style-type: none"><li>○ Obesity associated with Th17 cell phenotype bias</li></ul></li></ul>                                                                                                                                                                                                                  | (Abdel-Moneim et al. 2018; Butler et al. 2003; Chen et al. 2016; Hotamisligil 2006; Hotamisligil and Spiegelman 1994; Ip et al. 2016; Matthews et al. 1985; Ohshima et al. 2012; Zhang et al. 2014)                              |
| Rheumatoid Arthritis (RA)                                                    | <ul style="list-style-type: none"><li>• Th17 activity linked to onset and bone resorption disease phases through induction of TNF-alpha, IL-6, chemokines and osteoclastic mediators (i.e. metalloproteinases)</li><li>• Increased infiltration of Th17 cells in RA synovial fluid and elevated frequency of Th17 cells in peripheral blood associated with RA patients</li></ul>                                                                                                                                                                                                                                 | (Chabaud et al. 1999; Doreau et al. 2009; Kim et al. 2013; Kirkham et al. 2006; Koenders et al. 2006; Koenders et al. 2005; Pene et al. 2008; Sasai et al. 1999; Sato et al. 2006; Shahrara et al. 2008; van                     |

|                                    |                                                                                                                                                                                                                                                                                                                                                                                                                                                                                                                                                                                                                                                                                                                                                                                                                                |                                                                                                                                                                                                                                                                                                                                        |
|------------------------------------|--------------------------------------------------------------------------------------------------------------------------------------------------------------------------------------------------------------------------------------------------------------------------------------------------------------------------------------------------------------------------------------------------------------------------------------------------------------------------------------------------------------------------------------------------------------------------------------------------------------------------------------------------------------------------------------------------------------------------------------------------------------------------------------------------------------------------------|----------------------------------------------------------------------------------------------------------------------------------------------------------------------------------------------------------------------------------------------------------------------------------------------------------------------------------------|
|                                    | <ul style="list-style-type: none"> <li>• Murine Models: (i.e. Collagen-induced Arthritis (CIA)) <ul style="list-style-type: none"> <li>○ Disease attenuation/protection in IL-17 deficient, IL-1RA antagonist, and IL-17 neutralized antibody treatment mice</li> </ul> </li> </ul>                                                                                                                                                                                                                                                                                                                                                                                                                                                                                                                                            | Hamburg and Tas 2018; Wang et al. 2012)                                                                                                                                                                                                                                                                                                |
| Inflammatory Bowel Disease (IBD)   | <ul style="list-style-type: none"> <li>• Genome-wide association studies significantly link IBD to Th17 pathways</li> <li>• Th17 cells infiltrate and enrich in intestinal mucosa of IBD</li> <li>• Commensal-specific T cells demonstrate bias towards pathogenic Th17 phenotypes</li> <li>• Murine Models: <ul style="list-style-type: none"> <li>○ Th17 cells implicated in relationship between microbial dysbiosis and pathogenic, pro-inflammatory host response</li> <li>○ Humanized mice with dysbiotic intestinal flora from human patients elicit bias towards colitogenic pathogenic Th17 populations</li> <li>○ Th17 cells potentially mediate colitis in transfer models via transformation to pathogenic Th17 phenotype and support of conventional Th17 cells</li> </ul> </li> </ul>                            | (Britton et al. 2019; Calderon-Gomez et al. 2016; Cao et al. 2015; Fujino et al. 2003; Harbour et al. 2015; Holtta et al. 2008; Huang et al. 2017; Jostins et al. 2012; Kobayashi et al. 2008; Nimmo et al. 2012; Pene et al. 2008; Ramesh et al. 2014; Rivas et al. 2011; Schirmer et al. 2019; Ueno et al. 2018; Wilson et al. 2007) |
| Systemic Lupus Erythematosus (SLE) | <ul style="list-style-type: none"> <li>• Th17 responses correlated to SLE disease activity</li> <li>• Th1/Th17 imbalance and IL-6 dysregulation indicated in pathogenesis</li> <li>• Elevated IL-17 and IFN-<math>\gamma</math> levels in peripheral blood mononuclear cells (PBMCs) and T-cells from draining lymph nodes in patients with SLE</li> <li>• IL-17 promotes survival and proliferation of human B-cells</li> <li>• Elevated IL-17 cytokine levels in patients with SLE-associated nephritis</li> <li>• Murine Models: <ul style="list-style-type: none"> <li>○ Lupus-prone MRL/lpr mice demonstrate elevated expression of IL-17</li> <li>○ IL-13 receptor deficient mice are protected from lupus nephritis in lupus-prone mice and demonstrated reductions in Th17 cells in lymph nodes</li> </ul> </li> </ul> | (Doreau et al. 2009; Jacob et al. 2009; Kwan et al. 2009; Kyttaris et al. 2010; Shah et al. 2010; Wang et al. 2010; Yang et al. 2009; Zhang et al. 2009; Zhao et al. 2010)                                                                                                                                                             |
| Sjogren's Syndrome (SS)            | <ul style="list-style-type: none"> <li>• Infiltration of Th17 cells and presence of IL-17 in glandular tissues of primary Sjogren's syndrome (pSS)</li> <li>• Increase in circulating Th17 cells in pSS patients</li> </ul>                                                                                                                                                                                                                                                                                                                                                                                                                                                                                                                                                                                                    | (Iizuka et al. 2015; Lin et al. 2015; Lin et al. 2011; Verstappen et al. 2018; Verstappen et al. 2017; Voigt et al.                                                                                                                                                                                                                    |

|  |                                                                                                                                                                                                                                                                                                 |                                             |
|--|-------------------------------------------------------------------------------------------------------------------------------------------------------------------------------------------------------------------------------------------------------------------------------------------------|---------------------------------------------|
|  | <ul style="list-style-type: none"> <li>• Role of pathogenic plasticity suggested in disease activity and progression</li> <li>• Murine models: <ul style="list-style-type: none"> <li>○ Th17 cells drive disease</li> <li>○ IL-17 promotes autoreactive B-cell responses</li> </ul> </li> </ul> | 2016; Wanchoo et al. 2017; You et al. 2015) |
|--|-------------------------------------------------------------------------------------------------------------------------------------------------------------------------------------------------------------------------------------------------------------------------------------------------|---------------------------------------------|

\*EAE is an animal model of multiple sclerosis/central nervous system inflammatory demyelinating disease. Examples and descriptions of Th17 involvement in autoimmune and chronic inflammatory diseases included. These diseases have been shown to clinically associate with periodontitis and/or apical periodontitis. Notable corresponding references listed. *Note: Table provides limited summary of Th17 associated diseases and roles. For comprehensive reviews see (Kamali et al. 2019; Korn et al. 2009; Maddur et al. 2012; Weaver et al. 2007; Yasuda et al. 2019).*

## REERENCES

- Abdel-Moneim A, Bakery HH, Allam G. 2018. The potential pathogenic role of il-17/th17 cells in both type 1 and type 2 diabetes mellitus. *Biomed Pharmacother.* 101:287-292.
- Borilova Linhartova P, Kastovsky J, Lucanova S, Bartova J, Poskerova H, Vokurka J, Fassmann A, Kankova K, Izakovicova Holla L. 2016. Interleukin-17a gene variability in patients with type 1 diabetes mellitus and chronic periodontitis: Its correlation with il-17 levels and the occurrence of periodontopathic bacteria. *Mediators Inflamm.* 2016:2979846.
- Bradshaw EM, Raddassi K, Elyaman W, Orban T, Gottlieb PA, Kent SC, Hafler DA. 2009. Monocytes from patients with type 1 diabetes spontaneously secrete proinflammatory cytokines inducing th17 cells. *J Immunol.* 183(7):4432-4439.
- Britton GJ, Contijoch EJ, Mogno I, Vennaro OH, Llewellyn SR, Ng R, Li Z, Mortha A, Merad M, Das A et al. 2019. Microbiotas from humans with inflammatory bowel disease alter the balance of gut th17 and rogammat(+) regulatory t cells and exacerbate colitis in mice. *Immunity.* 50(1):212-224 e214.
- Butler AE, Janson J, Bonner-Weir S, Ritzel R, Rizza RA, Butler PC. 2003. Beta-cell deficit and increased beta-cell apoptosis in humans with type 2 diabetes. *Diabetes.* 52(1):102-110.
- Calderon-Gomez E, Bassolas-Molina H, Mora-Buch R, Dotti I, Planell N, Esteller M, Gallego M, Marti M, Garcia-Martin C, Martinez-Torro C et al. 2016. Commensal-specific cd4(+) cells from patients with crohn's disease have a t-helper 17 inflammatory profile. *Gastroenterology.* 151(3):489-500 e483.
- Cao Z, Conway KL, Heath RJ, Rush JS, Leshchiner ES, Ramirez-Ortiz ZG, Nedelsky NB, Huang H, Ng A, Gardet A et al. 2015. Ubiquitin ligase trim62 regulates card9-mediated anti-fungal immunity and intestinal inflammation. *Immunity.* 43(4):715-726.
- Chabaud M, Durand JM, Buchs N, Fossiez F, Page G, Frappart L, Miossec P. 1999. Human interleukin-17: A t cell-derived proinflammatory cytokine produced by the rheumatoid synovium. *Arthritis Rheum.* 42(5):963-970.
- Chen H, Ren X, Liao N, Wen F. 2016. Th17 cell frequency and il-17a concentrations in peripheral blood mononuclear cells and vitreous fluid from patients with diabetic retinopathy. *J Int Med Res.* 44(6):1403-1413.
- Doreau A, Belot A, Bastid J, Riche B, Trescol-Biemont MC, Ranchin B, Fabien N, Cochat P, Pouteil-Noble C, Trolliet P et al. 2009. Interleukin 17 acts in synergy with b cell-activating factor to influence b cell biology and the pathophysiology of systemic lupus erythematosus. *Nat Immunol.* 10(7):778-785.
- Espinoza JL, Takami A, Nakata K, Onizuka M, Kawase T, Akiyama H, Miyamura K, Morishima Y, Fukuda T, Kodera Y et al. 2011. A genetic variant in the il-17 promoter is functionally associated with acute graft-versus-host disease after unrelated bone marrow transplantation. *PLoS One.* 6(10):e26229.
- Fletcher JM, Lonergan R, Costelloe L, Kinsella K, Moran B, O'Farrelly C, Tubridy N, Mills KH. 2009. Cd39+foxp3+ regulatory t cells suppress pathogenic th17 cells and are impaired in multiple sclerosis. *J Immunol.* 183(11):7602-7610.
- Fujino S, Andoh A, Bamba S, Ogawa A, Hata K, Araki Y, Bamba T, Fujiyama Y. 2003. Increased expression of interleukin 17 in inflammatory bowel disease. *Gut.* 52(1):65-70.



- Harbour SN, Maynard CL, Zindl CL, Schoeb TR, Weaver CT. 2015. Th17 cells give rise to th1 cells that are required for the pathogenesis of colitis. *Proc Natl Acad Sci U S A*. 112(22):7061-7066.
- Holtta V, Klemetti P, Sipponen T, Westerholm-Ormio M, Kociubinski G, Salo H, Rasanen L, Kolho KL, Farkkila M, Savilahti E et al. 2008. IL-23/IL-17 immunity as a hallmark of Crohn's disease. *Inflamm Bowel Dis*. 14(9):1175-1184.
- Hotamisligil GS. 2006. Inflammation and metabolic disorders. *Nature*. 444(7121):860-867.
- Hotamisligil GS, Spiegelman BM. 1994. Tumor necrosis factor alpha: A key component of the obesity-diabetes link. *Diabetes*. 43(11):1271-1278.
- Huang H, Fang M, Jostins L, Umicevic Mirkov M, Boucher G, Anderson CA, Andersen V, Cleynen I, Cortes A, Crisns F et al. 2017. Fine-mapping inflammatory bowel disease loci to single-variant resolution. *Nature*. 547(7662):173-178.
- Iizuka M, Tsuboi H, Matsuo N, Asashima H, Hirota T, Kondo Y, Iwakura Y, Takahashi S, Matsumoto I, Sumida T. 2015. A crucial role of  $\gamma$  in the development of spontaneous sialadenitis-like Sjogren's syndrome. *J Immunol*. 194(1):56-67.
- Ip B, Cilfone NA, Belkina AC, DeFuria J, Jagannathan-Bogdan M, Zhu M, Kuchibhatla R, McDonnell ME, Xiao Q, Kepler TB et al. 2016. Th17 cytokines differentiate obesity from obesity-associated type 2 diabetes and promote TNF $\alpha$  production. *Obesity (Silver Spring)*. 24(1):102-112.
- Jacob N, Yang H, Pricop L, Liu Y, Gao X, Zheng SG, Wang J, Gao HX, Putterman C, Koss MN et al. 2009. Accelerated pathological and clinical nephritis in systemic lupus erythematosus-prone New Zealand mixed 2328 mice doubly deficient in TNF receptor 1 and TNF receptor 2 via a Th17-associated pathway. *J Immunol*. 182(4):2532-2541.
- Jostins L, Ripke S, Weersma RK, Duerr RH, McGovern DP, Hui KY, Lee JC, Schumm LP, Sharma Y, Anderson CA et al. 2012. Host-microbe interactions have shaped the genetic architecture of inflammatory bowel disease. *Nature*. 491(7422):119-124.
- Kamali AN, Noorbakhsh SM, Hamedifar H, Jadidi-Niaragh F, Yazdani R, Bautista JM, Azizi G. 2019. A role for Th1-like Th17 cells in the pathogenesis of inflammatory and autoimmune disorders. *Mol Immunol*. 105:107-115.
- Kebir H, Kreymborg K, Ifergan I, Dodelet-Devillers A, Cayrol R, Bernard M, Giuliani F, Arbour N, Becher B, Prat A. 2007. Human Th17 lymphocytes promote blood-brain barrier disruption and central nervous system inflammation. *Nat Med*. 13(10):1173-1175.
- Kim J, Kang S, Kim J, Kwon G, Koo S. 2013. Elevated levels of T helper 17 cells are associated with disease activity in patients with rheumatoid arthritis. *Ann Lab Med*. 33(1):52-59.
- Kirkham BW, Lassere MN, Edmonds JP, Juhasz KM, Bird PA, Lee CS, Shnier R, Portek IJ. 2006. Synovial membrane cytokine expression is predictive of joint damage progression in rheumatoid arthritis: A two-year prospective study (the damage study cohort). *Arthritis Rheum*. 54(4):1122-1131.
- Kobayashi T, Okamoto S, Hisamatsu T, Kamada N, Chinen H, Saito R, Kitazume MT, Nakazawa A, Sugita A, Koganei K et al. 2008. IL23 differentially regulates the Th1/Th17 balance in ulcerative colitis and Crohn's disease. *Gut*. 57(12):1682-1689.
- Koenders MI, Joosten LA, van den Berg WB. 2006. Potential new targets in arthritis therapy: Interleukin (IL)-17 and its relation to tumor necrosis factor and IL-1 in experimental arthritis. *Ann Rheum Dis*. 65 Suppl 3:iii29-33.
- Koenders MI, Lubberts E, Oppers-Walgreen B, van den Bersselaar L, Helsen MM, Di Padova FE, Boots AM, Gram H, Joosten LA, van den Berg WB. 2005. Blocking of interleukin-17 during reactivation of experimental arthritis prevents joint inflammation and bone erosion by decreasing RANKL and interleukin-1. *Am J Pathol*. 167(1):141-149.
- Korn T, Bettelli E, Oukka M, Kuchroo VK. 2009. IL-17 and Th17 cells. *Annu Rev Immunol*. 27:485-517.
- Kumar P, Subramaniam G. 2015. Molecular underpinnings of Th17 immune-regulation and their implications in autoimmune diabetes. *Cytokine*. 71(2):366-376.
- Kwan BC, Tam LS, Lai KB, Lai FM, Li EK, Wang G, Chow KM, Li PK, Szeto CC. 2009. The gene expression of type 17 T-helper cell-related cytokines in the urinary sediment of patients with systemic lupus erythematosus. *Rheumatology (Oxford)*. 48(12):1491-1497.
- Kyttaris VC, Zhang Z, Kuchroo VK, Oukka M, Tsokos GC. 2010. Cutting edge: IL-23 receptor deficiency prevents the development of lupus nephritis in C57BL/6-lpr/lpr mice. *J Immunol*. 184(9):4605-4609.

- Langrish CL, Chen Y, Blumenschein WM, Mattson J, Basham B, Sedgwick JD, McClanahan T, Kastelein RA, Cua DJ. 2005. IL-23 drives a pathogenic T cell population that induces autoimmune inflammation. *J Exp Med.* 201(2):233-240.
- Li CR, Mueller EE, Bradley LM. 2014. Islet antigen-specific Th17 cells can induce TNF- $\alpha$ -dependent autoimmune diabetes. *J Immunol.* 192(4):1425-1432.
- Li YF, Zhang SX, Ma XW, Xue YL, Gao C, Li XY. 2017. Levels of peripheral Th17 cells and serum Th17-related cytokines in patients with multiple sclerosis: A meta-analysis. *Mult Scler Relat Disord.* 18:20-25.
- Lin X, Rui K, Deng J, Tian J, Wang X, Wang S, Ko KH, Jiao Z, Chan VS, Lau CS et al. 2015. Th17 cells play a critical role in the development of experimental Sjogren's syndrome. *Ann Rheum Dis.* 74(6):1302-1310.
- Lin X, Song JX, Shaw PC, Ng TB, Wong RN, Sze SC, Tong Y, Lee KF, Zhang KY. 2011. An autoimmunized mouse model recapitulates key features in the pathogenesis of Sjogren's syndrome. *Int Immunol.* 23(10):613-624.
- Lock C, Hermans G, Pedotti R, Brendolan A, Schadt E, Garren H, Langer-Gould A, Strober S, Cannella B, Allard J et al. 2002. Gene-microarray analysis of multiple sclerosis lesions yields new targets validated in autoimmune encephalomyelitis. *Nat Med.* 8(5):500-508.
- Ma J, McCarl CA, Khalil S, Luthy K, Feske S. 2010. T-cell-specific deletion of *Stim1* and *Stim2* protects mice from EAE by impairing the effector functions of Th1 and Th17 cells. *Eur J Immunol.* 40(11):3028-3042.
- Maddur MS, Miossec P, Kaveri SV, Bayry J. 2012. Th17 cells: Biology, pathogenesis of autoimmune and inflammatory diseases, and therapeutic strategies. *Am J Pathol.* 181(1):8-18.
- Martin-Orozco N, Chung Y, Chang SH, Wang YH, Dong C. 2009. Th17 cells promote pancreatic inflammation but only induce diabetes efficiently in lymphopenic hosts after conversion into Th1 cells. *Eur J Immunol.* 39(1):216-224.
- Matthews DR, Hosker JP, Rudenski AS, Naylor BA, Treacher DF, Turner RC. 1985. Homeostasis model assessment: Insulin resistance and beta-cell function from fasting plasma glucose and insulin concentrations in man. *Diabetologia.* 28(7):412-419.
- Matuszewski D, Kivisakk P, He B, Kostulas N, Ozenci V, Fredrikson S, Link H. 1999. Interleukin-17 mRNA expression in blood and CSF mononuclear cells is augmented in multiple sclerosis. *Mult Scler.* 5(2):101-104.
- Nimmo ER, Prendergast JG, Aldhous MC, Kennedy NA, Henderson P, Drummond HE, Ramsahoye BH, Wilson DC, Semple CA, Satsangi J. 2012. Genome-wide methylation profiling in Crohn's disease identifies altered epigenetic regulation of key host defense mechanisms including the Th17 pathway. *Inflamm Bowel Dis.* 18(5):889-899.
- Ohshima K, Mogi M, Jing F, Iwanami J, Tsukuda K, Min LJ, Higaki J, Horiuchi M. 2012. Roles of interleukin 17 in angiotensin II type 1 receptor-mediated insulin resistance. *Hypertension.* 59(2):493-499.
- Park H, Li Z, Yang XO, Chang SH, Nurieva R, Wang YH, Wang Y, Hood L, Zhu Z, Tian Q et al. 2005. A distinct lineage of CD4 T cells regulates tissue inflammation by producing interleukin 17. *Nat Immunol.* 6(11):1133-1141.
- Pene J, Chevalier S, Preisser L, Venereau E, Guilleux MH, Ghannam S, Moles JP, Danger Y, Ravon E, Lesaux S et al. 2008. Chronically inflamed human tissues are infiltrated by highly differentiated Th17 lymphocytes. *J Immunol.* 180(11):7423-7430.
- Ramesh R, Kozhaya L, McKeivitt K, Djuretic IM, Carlson TJ, Quintero MA, McCauley JL, Abreu MT, Unutmaz D, Sundrud MS. 2014. Pro-inflammatory human Th17 cells selectively express p-glycoprotein and are refractory to glucocorticoids. *J Exp Med.* 211(1):89-104.
- Reinert-Hartwall L, Honkanen J, Salo HM, Nieminen JK, Luopajarvi K, Harkonen T, Veijola R, Simell O, Ilonen J, Peet A et al. 2015. Th1/Th17 plasticity is a marker of advanced beta cell autoimmunity and impaired glucose tolerance in humans. *J Immunol.* 194(1):68-75.
- Rivas MA, Beaudoin M, Gardet A, Stevens C, Sharma Y, Zhang CK, Boucher G, Ripke S, Ellinghaus D, Burt N et al. 2011. Deep resequencing of GWAS loci identifies independent rare variants associated with inflammatory bowel disease. *Nat Genet.* 43(11):1066-1073.
- Roohi A, Tabrizi M, Abbasi F, Ataie-Jafari A, Nikbin B, Larijani B, Qorbani M, Meysamie A, Asgarian-Omran H, Nikmanesh B et al. 2014. Serum IL-17, IL-23, and TGF- $\beta$  levels in type 1 and type 2 diabetic patients and age-matched healthy controls. *Biomed Res Int.* 2014:718946.

- Sasai M, Saeki Y, Ohshima S, Nishioka K, Mima T, Tanaka T, Katada Y, Yoshizaki K, Suemura M, Kishimoto T. 1999. Delayed onset and reduced severity of collagen-induced arthritis in interleukin-6-deficient mice. *Arthritis Rheum.* 42(8):1635-1643.
- Sato K, Suematsu A, Okamoto K, Yamaguchi A, Morishita Y, Kadono Y, Tanaka S, Kodama T, Akira S, Iwakura Y et al. 2006. Th17 functions as an osteoclastogenic helper t cell subset that links t cell activation and bone destruction. *J Exp Med.* 203(12):2673-2682.
- Schirmer M, Garner A, Vlamakis H, Xavier RJ. 2019. Microbial genes and pathways in inflammatory bowel disease. *Nat Rev Microbiol.* 17(8):497-511.
- Shah K, Lee WW, Lee SH, Kim SH, Kang SW, Craft J, Kang I. 2010. Dysregulated balance of th17 and th1 cells in systemic lupus erythematosus. *Arthritis Res Ther.* 12(2):R53.
- Shahrara S, Huang Q, Mandelin AM, 2nd, Pope RM. 2008. Th-17 cells in rheumatoid arthritis. *Arthritis Res Ther.* 10(4):R93.
- Tzartos JS, Friese MA, Craner MJ, Palace J, Newcombe J, Esiri MM, Fugger L. 2008. Interleukin-17 production in central nervous system-infiltrating t cells and glial cells is associated with active disease in multiple sclerosis. *Am J Pathol.* 172(1):146-155.
- Ueno A, Jeffery L, Kobayashi T, Hibi T, Ghosh S, Jijon H. 2018. Th17 plasticity and its relevance to inflammatory bowel disease. *J Autoimmun.* 87:38-49.
- Uyttenhove C, Van Snick J. 2006. Development of an anti-il-17a auto-vaccine that prevents experimental auto-immune encephalomyelitis. *Eur J Immunol.* 36(11):2868-2874.
- van Hamburg JP, Tas SW. 2018. Molecular mechanisms underpinning t helper 17 cell heterogeneity and functions in rheumatoid arthritis. *J Autoimmun.* 87:69-81.
- Verstappen GM, Corneth OBJ, Bootsma H, Kroese FGM. 2018. Th17 cells in primary sjogren's syndrome: Pathogenicity and plasticity. *J Autoimmun.* 87:16-25.
- Verstappen GM, van Nimwegen JF, Vissink A, Kroese FGM, Bootsma H. 2017. The value of rituximab treatment in primary sjogren's syndrome. *Clin Immunol.* 182:62-71.
- Voigt A, Esfandiary L, Wanchoo A, Glenton P, Donate A, Craft WF, Craft SL, Nguyen CQ. 2016. Sexual dimorphic function of il-17 in salivary gland dysfunction of the c57bl/6.Nod-aec1aec2 model of sjogren's syndrome. *Sci Rep.* 6:38717.
- Wanchoo A, Voigt A, Sukumaran S, Stewart CM, Bhattacharya I, Nguyen CQ. 2017. Single-cell analysis reveals sexually dimorphic repertoires of interferon-gamma and il-17a producing t cells in salivary glands of sjogren's syndrome mice. *Sci Rep.* 7(1):12512.
- Wang W, Shao S, Jiao Z, Guo M, Xu H, Wang S. 2012. The th17/treg imbalance and cytokine environment in peripheral blood of patients with rheumatoid arthritis. *Rheumatol Int.* 32(4):887-893.
- Wang Y, Ito S, Chino Y, Goto D, Matsumoto I, Murata H, Tsutsumi A, Hayashi T, Uchida K, Usui J et al. 2010. Laser microdissection-based analysis of cytokine balance in the kidneys of patients with lupus nephritis. *Clin Exp Immunol.* 159(1):1-10.
- Weaver CT, Hatton RD, Mangan PR, Harrington LE. 2007. Il-17 family cytokines and the expanding diversity of effector t cell lineages. *Annu Rev Immunol.* 25:821-852.
- Wilson NJ, Boniface K, Chan JR, McKenzie BS, Blumenschein WM, Mattson JD, Basham B, Smith K, Chen T, Morel F et al. 2007. Development, cytokine profile and function of human interleukin 17-producing helper t cells. *Nat Immunol.* 8(9):950-957.
- Yang J, Chu Y, Yang X, Gao D, Zhu L, Yang X, Wan L, Li M. 2009. Th17 and natural treg cell population dynamics in systemic lupus erythematosus. *Arthritis Rheum.* 60(5):1472-1483.
- Yasuda K, Takeuchi Y, Hirota K. 2019. The pathogenicity of th17 cells in autoimmune diseases. *Semin Immunopathol.* 41(3):283-297.
- You IC, Bian F, Volpe EA, de Paiva CS, Pflugfelder SC. 2015. Age-related conjunctival disease in the c57bl/6.Nod-aec1aec2 mouse model of sjogren syndrome develops independent of lacrimal dysfunction. *Invest Ophthalmol Vis Sci.* 56(4):2224-2233.
- Zhang C, Xiao C, Wang P, Xu W, Zhang A, Li Q, Xu X. 2014. The alteration of th1/th2/th17/treg paradigm in patients with type 2 diabetes mellitus: Relationship with diabetic nephropathy. *Hum Immunol.* 75(4):289-296.
- Zhang Z, Kyttaris VC, Tsokos GC. 2009. The role of il-23/il-17 axis in lupus nephritis. *J Immunol.* 183(5):3160-3169.

Zhao XF, Pan HF, Yuan H, Zhang WH, Li XP, Wang GH, Wu GC, Su H, Pan FM, Li WX et al. 2010.  
Increased serum interleukin 17 in patients with systemic lupus erythematosus. *Mol Biol Rep.*  
37(1):81-85.
